# Supplementary material
Source: Springer Nature journal article supplement (https://www.springermedizin.de/resource/supplementary/12885_2009_2800_MOESM9_ESM.pdf/9461954)
Supplement: MOESM9 [file 9461954]

A MMP-9

MMP-2

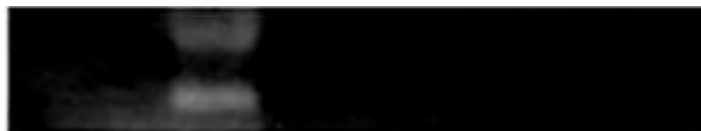

HA 100 $\mu$ g/ml (6h)

- + + + +

Anti-CD44 20 $\mu$ g/ml (3h)

- - + - -

PD98059 50 $\mu$ M (3h)

- - - + -

Manumycin A 0.6 $\mu$ M (3h)

- - - - +

B p-erk

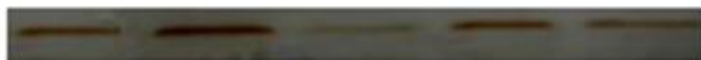

erk

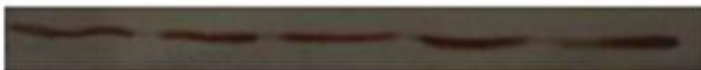

GAPDH

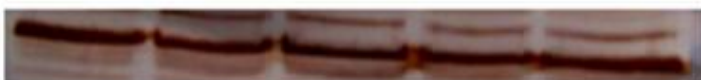

HA 100 $\mu$ g/ml (0.5h)

- + + + +

Anti-CD44 20 $\mu$ g/ml (3h)

- - + - -

PD98059 50 $\mu$ M (3h)

- - - + -

Manumycin A 0.6 $\mu$ M (3h)

- - - - +
